# Supplementary material
Source: publisher site journal article supplement (https://www.dovepress.com/article/482931)
Supplement: Supplementary file 1 [file get_supplementary_file.php]

**Supplementary materials**

**Supplementary table 1. The results of blood routine and biochemical test associated with infection.**

| **Patient** | **WBC (109/L)**  **(3.5~9.5)** | **NEUT (%)**  **(40~75)** | **Mo (%)**  **(3~10)** | **ESR (mm/h)** | **CRP (mg/L)** | **Culture results** |
| --- | --- | --- | --- | --- | --- | --- |
| P01 | 12.4 | 82.9 | 9.8 | 9 | 107.8 | Staphylococcus aureus |
| P02 | 3.6 | 58.8 | 7.5 | 16 | 6.58 | G+ coccus |
| P03 | 8.28 | 69.75 | 5.41 | 10 | 4.93 | - |
| P04 | 15.1 | 92.12 | 2.57 | 80 | 15 | Staphylococcus aureus |
| P05 | 5.6 | 57 | 10.2 | 23 | 4.6 | Staphylococcus haemolyticus |
| P06 | 6.6 | 59.6 | 11.1 | 2 | 1.9 | Staphylococcus aureus |
| P07 | 7.84 | 73.77 | 4.18 | 48 | 50 | - |
| P08 | 7.9 | 78.7 | 9.5 | 48 | 167 | Staphylococcus aureus |
| P09 | 4.85 | 57.1 | 9.1 | 52 | 5.57 | Staphylococcus epidermidis |
| P10 | 6.4 | 60.1 | 9.2 | 72 | 3.18 | Staphylococcus aureus |
| P11 | 3.7 | 56.3 | 6.8 | 67 | 1.2 | Staphylococcus aureus |
| P12 | 8.37 | 78.6 | 5.2 | 21 | 10 | - |
| P13 | 8.97 | 65.2 | 11.7 | 56 | 68.22 | Staphylococcus aureus |
| P14 | 7 | 57.3 | 8.2 | 120 | 51.5 | Escherichia coli |
| P15 | 4.8 | 70.6 | 10.1 | 120 | 12.3 | Pseudomonas aeruginosa |
| P16 | 5.1 | 65.1 | 7.7 | 6 | 0.8 | - |
| P17 | 7.6 | 72.6 | 5.2 | 58 | 69.2 | - |
| P18 | 4.9 | 50.7 | 10.9 | 55 | 128.4 | - |
| P19 | 4.28 | 67.92 | 5.91 | 17 | 7.03 | - |
| P20 | 6.83 | 65.9 | 6.45 | 83 | 89.79 | - |
| P21 | 8.78 | 79.9 | 5.3 | 96 | 36.5 | - |
| P22 | 5.6 | 53.6 | 9.8 | 12 | 3.14 | Staphylococcus aureus |
| P23 | 10.8 | 86.75 | 4.89 | 60 | 184 | Staphylococcus aureus |
| P25 | 8.2 | 63.8 | 7.9 | 118 | 89.6 | - |
| P26 | 6.3 | 60.5 | 8.2 | 35 | 40.7 | - |
| P27 | 4.81 | 41.6 | 10.8 | 4 | 0.52 | - |
| P28 | 7.2 | 51.1 | 8.2 | 5 | 1.25 | G+ bacilli |
| P30 | 17.54 | 89.87 | 4.06 | 86 | 363 | Staphylococcus aureus |
| P31 | 7.8 | 74.5 | 8.1 | 120 | 60 | Streptococcus agalactiae |
| P32 | 8.3 | 71.2 | 8.4 | 110 | 105 | Staphylococcus epidermidis, Pseudomonas aeruginosa |

**Supplementary Figure 1.** Correlation between bacterial culture, metagenomics detection, and blood test results. The circles represent the strength of correlation between the factors, with the size and color of the circle indicating the strength and direction of the correlation. A cross on the circle indicates no significant correlation (P ≥ 0.05).

**A)** Correlation analysis based on blood tests, the positivity or negativity of culture results, and whether a dominant pathogen was detected by metagenomics.
**B)** Correlation analysis using the categorization of blood tests as normal or abnormal, the positivity or negativity of culture results, and whether a dominant pathogen was detected by metagenomics.

A)


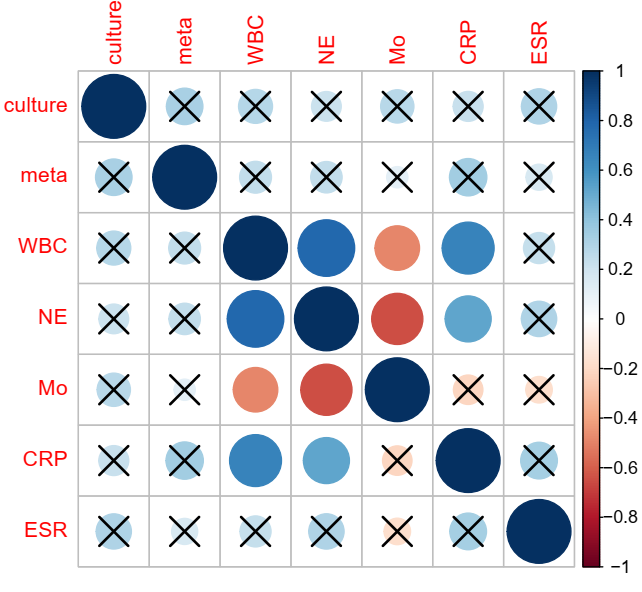


B)


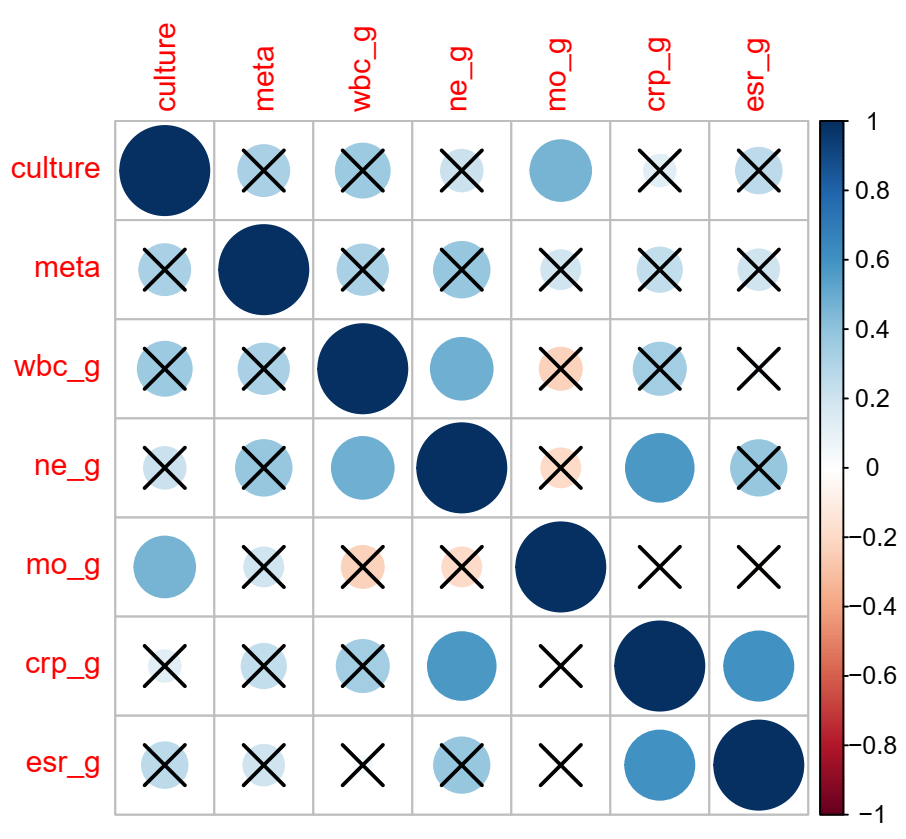


**Supplementary table 2. The results with16S sequencing result.**

| **No** | **ID** | **Age** | **Sex** | **Sample source** | **Surgery*** | **Sampling time since surgery** | **Culture results** | **Part of analyzed 16S sequencing result** | **WBC** | **NE** | **Mo** | **ESR** | **CRP** |
| --- | --- | --- | --- | --- | --- | --- | --- | --- | --- | --- | --- | --- | --- |
| 1 | P01 | 80 | M | Hip | THA | 8 years | *Staphylococcus aureus* | g__Staphylococcus (35.81), g__Staphylococcus..s__aureus (27.48) | 12.4 | 82.9 | 9.8 | 9 | 107.8 |
| 2 | P02 | 75 | F | Knee | TKA | 1 years | *G+ coccus* | g__Finegoldia (56.25), g__Corynebacterium (21.99), g__Anaerococcus (6.48), g__Staphylococcus (4.93) | 3.6 | 58.8 | 7.5 | 16 | 6.58 |
| 3 | P03 | 60 | F | Knee | ORIF | 1 week | *-* | g__Agrobacterium (63.96), g__Comamonas (9.01), g__Sphingomonas (6.85) | 8.28 | 69.75 | 5.41 | 10 | 4.93 |
| 4 | P04 | 28 | F | Knee | ORIF | 3 days | *Staphylococcus aureus* | g__Staphylococcus..s__aureus (8.20), g__Staphylococcus (7.88) | 15.10 | 92.12 | 2.57 | 80 | 15 |
| 5 | P05 | 75 | M | Tibia | ORIF | 4 days | *Staphylococcus haemolyticus* | g__Staphylococcus (53.80), f__Comamonadaceae (13.34), g__Burkholderia (8.21), g__Agrobacterium (7.33), g__Comamonas (6.62) | 5.60 | 57 | 10.2 | 23 | 4.6 |
| 6 | P06 | 61 | M | Tibia | ORIF | 7 days | *Staphylococcus aureus* | g__Staphylococcus (39.16), g__Staphylococcus..s__aureus (30.25) | 6.6 | 59.6 | 11.1 | 2 | 1.9 |
| 7 | P07 | 47 | F | Knee | TKA | 2 years | *-* | g__Finegoldia (43.50), g__Peptoniphilus (28.57), g__Anaerococcus (23.70) | 7.84 | 73.77 | 4.18 | 48 | 50 |
| 8 | P08 | 51 | M | Knee | TKA | 10 months | *Staphylococcus aureus* | g__Staphylococcus (9.07), g__Staphylococcus..s__aureus (7.56) | 7.9 | 78.7 | 9.5 | 48 | 167 |
| 9 | P09 | 67 | M | Knee | TKA | 10 years | *Staphylococcus epidermidis* | g__Staphylococcus..s__aureus (10.65), g__Staphylococcus (10.64) | 4.85 | 57.1 | 9.1 | 52 | 5.57 |
| 10 | P10 | 66 | F | Calcaneus | ORIF | 5 days | *Staphylococcus aureus* | g__Staphylococcus..s__aureus (24.75), g__Staphylococcus (24.27) | 6.4 | 60.1 | 9.2 | 72 | 3.18 |
| 11 | P11 | 71 | F | Knee | arthroscope | 4 days | *Staphylococcus aureus* | g__Staphylococcus (3.34), g__Staphylococcus..s__aureus (2.64) | 3.7 | 56.3 | 6.8 | 67 | 1.2 |
| 12 | P12 | 33 | M | Ankle | Achilles Tendon suture | 5 days | *-* | g__Fusobacterium (44.79), f__Tissierellaceae..g__WAL_1855D (10.69), g__Prevotella (10.33), g__Porphyromonas (8.76), g__Streptococcus (2.25) | 8.37 | 78.6 | 5.2 | 21 | 10 |
| 13 | P13 | 59 | M | Buttock | cystectomy | 6 days | *Staphylococcus aureus* | g__Staphylococcus (30.59), g__Staphylococcus..s__aureus (24.89) | 8.97 | 65.2 | 11.7 | 56 | 68.22 |
| 14 | P14 | 63 | M | Spine# | ORIF | 6 days | *Escherichia coli* | g__Anaerococcus (91.16) | 7.00 | 57.3 | 8.2 | 120 | 51.5 |
| 15 | P15 | 82 | F | Hip | ORIF | 1 week | *Pseudomonas aeruginosa* | g__Burkholderia (36.11), f__Comamonadaceae (34.78), g__Achromobacter (10.23), f__Microbacteriaceae (7.03) | 4.8 | 70.6 | 10.1 | 120 | 12.3 |
| 16 | P16 | 64 | M | Ankle | ORIF | 29 days | *-* | g__Porphyromonas (55.01), g__Peptoniphilus (19.11), g__Finegoldia (10.25), g__Anaerococcus (8.67) | 5.1 | 65.1 | 7.7 | 6 | 0.8 |
| 17 | P17 | 65 | F | Knee | TKA | 6 years | *-* | f__Comamonadaceae (31.42), g__Burkholderia (29.24), f__Sphingomonadaceae (21.29) | 7.60 | 72.6 | 5.2 | 58 | 69.2 |
| 18 | P18 | 58 | M | Spine# | ORIF | 5 days | *-* | f__Fusobacteriaceae..g__Fusobacterium (59.92), g__Parvimonas (14.64), g__Haemophilus..s__parainfluenzae (10.95), g__Streptococcus (4.74） | 4.9 | 50.7 | 10.9 | 55 | 128.4 |
| 19 | P19 | 68 | M | Knee | TKA | 3 months | *-* | f__Comamonadaceae (44.85), g__Burkholderia (41.65), g__Comamonas (5.01) | 4.28 | 67.92 | 5.91 | 17 | 7.03 |
| 20 | P20 | 69 | F | Hip | THA | 8 weeks | *-* | g__Prevotella..s__nanceiensis (25.25), g__Prevotella..s__melaninogenica (17.22), g__Parvimonas (13.52), g__Fusobacterium (13.28), g__Prevotella (13.03) | 6.83 | 65.9 | 6.45 | 83 | 89.79 |
| 21 | P21 | 62 | F | Knee | TKA | 2 years | *-* | f__Tissierellaceae..WAL_1855D (28.36), g__Porphyromonas (18.63), g__Fusobacterium (11.62), g__Prevotella (10.75), g__Porphyromonas (9.36), g__Peptoniphilus (6.26) | 8.78 | 79.9 | 5.3 | 96 | 36.5 |
| 22 | P22 | 49 | M | Tibia | ORIF | 35 days | *Staphylococcus aureus* | g__Staphylococcus (25.95), g__Staphylococcus..s__aureus (20.31), g__Anaerococcus (7.09), g__Agrobacterium (5.36) | 5.60 | 53.6 | 9.8 | 12 | 3.14 |
| 23 | P23 | 81 | F | Shoulder | TSA | 8 years | *Staphylococcus aureus* | g__Staphylococcus..s__aureus (13.16), g__Staphylococcus (12.98) | 10.8 | 86.75 | 4.89 | 60 | 184 |
| 24 | P25 | 56 | M | Spine# | ORIF | 7 days | *-* | f__Microbacteriaceae (25.33), f__Comamonadaceae (21.24), g__Burkholderia (13.39), g__Comamonas (11.42), g__Sphingomonas (7.05), g__Agrobacterium (6.00) | 8.2 | 63.8 | 7.9 | 118 | 89.6 |
| 25 | P26 | 70 | M | Hip | ORIF | 3 weeks | *-* | f__Rhizobiaceae (31.60), g__Agrobacterium (19.11), f__Rhizobiaceae (14.69), g__Comamonas (9.72), f__Bradyrhizobiaceae (6.52), g__Bradyrhizobium (6.17), g__Burkholderia (5.13) | 6.30 | 60.5 | 8.2 | 35 | 40.7 |
| 26 | P27 | 35 | M | Knee | MPFL Recon | 7days | *-* | g__Agrobacterium (35.29), g__Burkholderia (26.17), f__Comamonadaceae (16.75), g__Bradyrhizobium (7.00), g__Comamonas (6.72), g__Mesorhizobium (5.95) | 4.81 | 41.6 | 10.8 | 4 | 0.52 |
| 27 | P28 | 53 | M | Elbow | ORIF | 5 days | *G+ bacilli* | f__Comamonadaceae (23.71), g__Agrobacterium (20.59), g__Burkholderia (20.33), g__Comamonas (9.77), f__Rhizobiaceae (7.81), g__Mesorhizobium (5.94) | 7.2 | 51.1 | 8.2 | 5 | 1.25 |
| 28 | P30 | 66 | F | Tibia | ORIF | 28 days | *Staphylococcus aureus* | g__Staphylococcus (11.27), g__Staphylococcus..s__aureus (8.01) | 7.8 | 74.5 | 8.1 | 120 | 60 |
| 29 | P31 | 62 | F | Hip | THA | 19 years | *Streptococcus agalactiae* | g__Streptococcus (45.37), g__Streptococcus..s__agalactiae (43.15) | 17.54 | 89.87 | 4.06 | 86 | 363 |
| 30 | P32 | 72 | F | Hip | THA | 5 years | *Staphylococcus epidermidis, Pseudomonas aeruginosa* | g__Streptococcus (85.65) | 8.3 | 71.2 | 8.4 | 110 | 105 |

*THA: Total hip arthroplasty; TKA: Total knee arthroplasty; TSA: Total shoulder arthroplasty; ORIF: Open Reduction Internal Fixation;

#Spine sample source include：Thoracic intervertebral, Lumbar Vertebra, cervical spine
